# Supplementary material for: Blocking interleukin-4 enhances efficacy of vaccines for treatment of opioid abuse and prevention of opioid overdose
Source: PubMed Central journal article supplement (PMC5882912; doi:10.1038/s41598-018-23777-6), 2018-04-03
Supplement: 41598_2018_23777_MOESM1_ESM.pdf [file 41598_2018_23777_MOESM1_ESM.pdf]

## Blocking interleukin-4 enhances efficacy of vaccines for treatment of opioid abuse and prevention of opioid overdose

Megan Laudenbach, Federico Baruffaldi, Christine Robinson, Philipp Carter, Davis Seelig, Carly Baehr, and Marco Pravetoni

### Supplementary Information

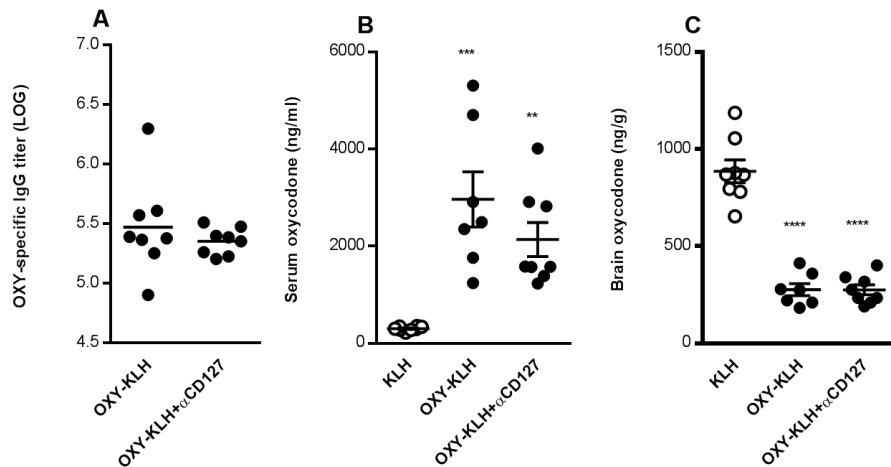

**Supplemental Figure S1. IL-7 receptor blockage does not enhance OXY-KLH efficacy.** Male BALB/c mice were immunized s.c. on days 0, 14, and 28, and challenged with 2.25 mg/kg s.c. oxycodone a week after the 3<sup>rd</sup> immunization. Mice received unconjugated KLH, OXY-KLH, or OXY-KLH plus an anti-IL-7 $\alpha$  receptor mAb ( $\alpha$ CD127, 1.0 mg per mouse, intraperitoneally). The OXY-KLH and KLH were adsorbed on alum adjuvant prior to administration. The mAb was administered 2 days prior and 1 day after the 1<sup>st</sup> immunization. A) oxycodone-specific IgG antibody titers, and effect of immunization on oxycodone distribution to B) serum and C) brain. Data are mean  $\pm$  SEM. Data shown are from one experiment (n=8). One-way ANOVA paired with Tukey's multiple comparisons. \*\* $p < 0.01$ , \*\*\* $p < 0.001$ , \*\*\*\* $p < 0.0001$  compared to KLH control.

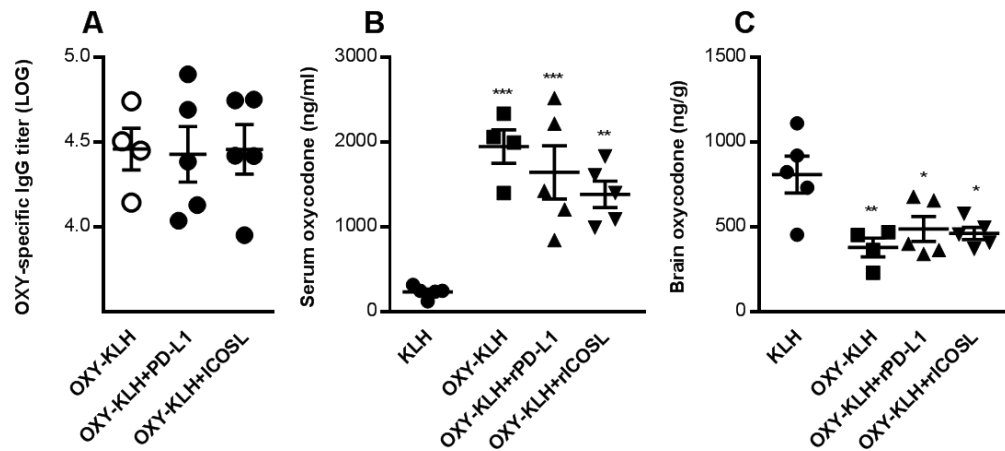

**Supplemental Figure S2. Co-stimulatory molecules do not enhance OXY-KLH efficacy.** Male BALB/c mice were immunized s.c. on days 0, 14, and 28, and challenged with 5 mg/kg s.c. oxycodone a week after the 3<sup>rd</sup> immunization. Mice received KLH, OXY-KLH, or OXY-KLH plus either recombinant Programmable Death Ligand 1 (rPD-L1) or recombinant ICOS ligand (rICOSL). The OXY-KLH and the unconjugated KLH were adsorbed on alum adjuvant prior to administration. PD-L1 and ICOSL were co-administered s.c. with vaccines. A) oxycodone-specific IgG antibody titers, effect of immunization on oxycodone distribution to B) serum and C) brain. Data are mean±SEM. Data shown are from one experiment (n=5). One-way ANOVA paired with Tukey's multiple comparisons. \*p<0.05, \*\*p<0.01, \*\*\*p<0.001, \*\*\*\*p<0.0001 compared to KLH control.

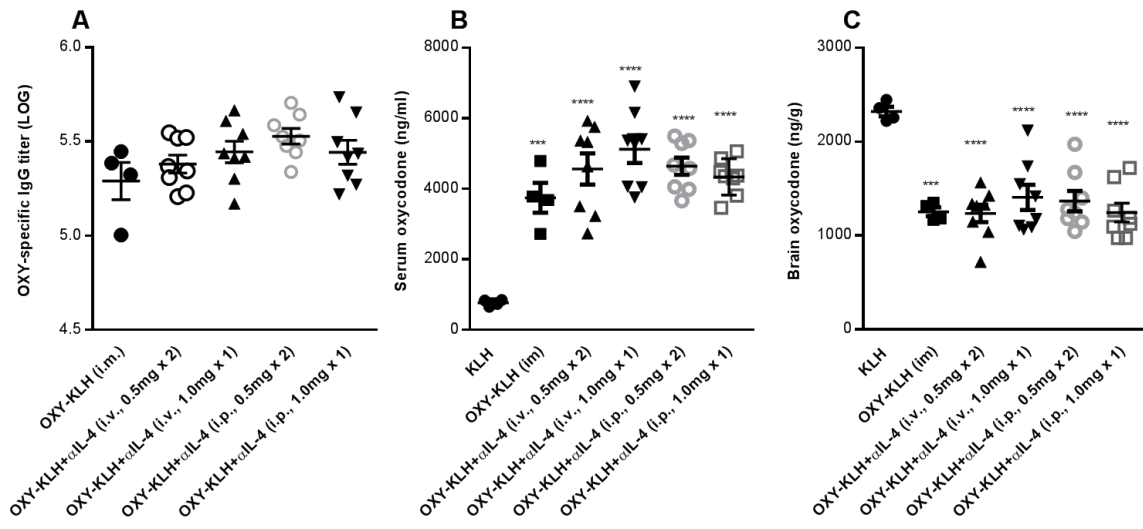

**Supplemental Figure S3. Co-administration of OXY-KLH plus  $\alpha$ IL-4 mAb is effective across clinically-relevant immunization regimens.** Male BALB/c mice were immunized i.m. with OXY-KLH or KLH on days 0, 14 and 28, and challenged with 5.0 mg/kg oxycodone a week after the third immunization. Mice received KLH (n=4), OXY-KLH (n=4), or OXY-KLH plus the  $\alpha$ IL-4 mAb (n=8). As labeled,  $\alpha$ IL-4 mAb was administered either i.p. or i.v., either as 1 dose (1.0 mg) or 2 doses (0.5mg each). Data are from one experiment and expressed as mean $\pm$ SEM. One-way ANOVA paired with Tukey's multiple comparisons. \*\*\*p<0.001, \*\*\*\*p<0.0001 compared to KLH.

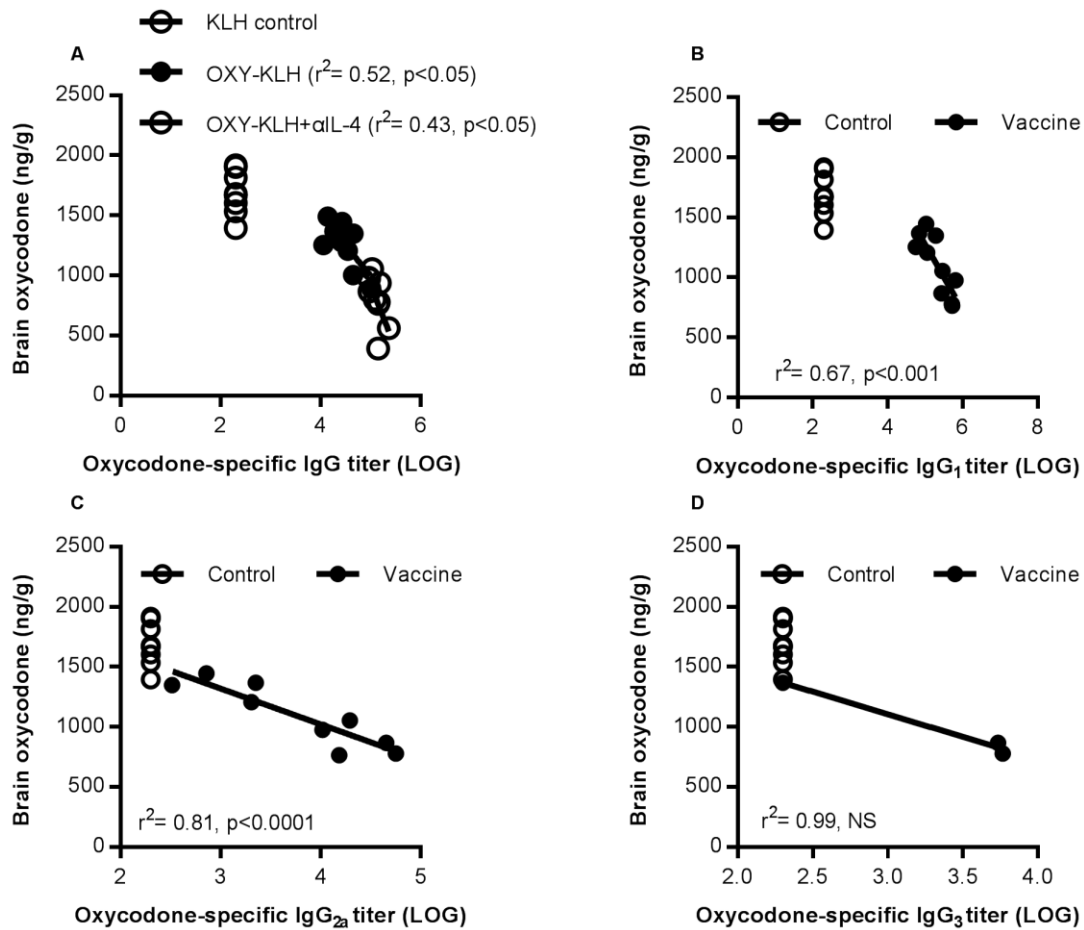

**Supplemental Figure S4. Increased oxycodone-specific serum IgG, IgG<sub>1</sub>, and IgG<sub>2a</sub> antibody titers correlated with reduction in brain oxycodone.** A-D) Analysis was performed on individual mice challenged with 5mg/kg oxycodone and reported in Figure 1E-G. A) Linear regression of oxycodone-specific serum IgG titers and brain concentration in mice treated with either OXY-KLH or OXY-KLH plus  $\alpha$ IL-4 mAb (n=10 mice each group). The individual brain oxycodone concentrations in the KLH control group are provided as comparison (n=10). B-D) Linear regression of oxycodone-specific serum IgG<sub>1</sub>, IgG<sub>2a</sub>, and IgG<sub>3</sub> titers and brain concentration in immunized mice. The vaccine treatment group includes mice immunized with OXY-KLH (n=5) and OXY-KLH plus  $\alpha$ IL-4 mAb (n=5). D) Most individual mice in this cohort had little to no detectable IgG<sub>3</sub> titers.

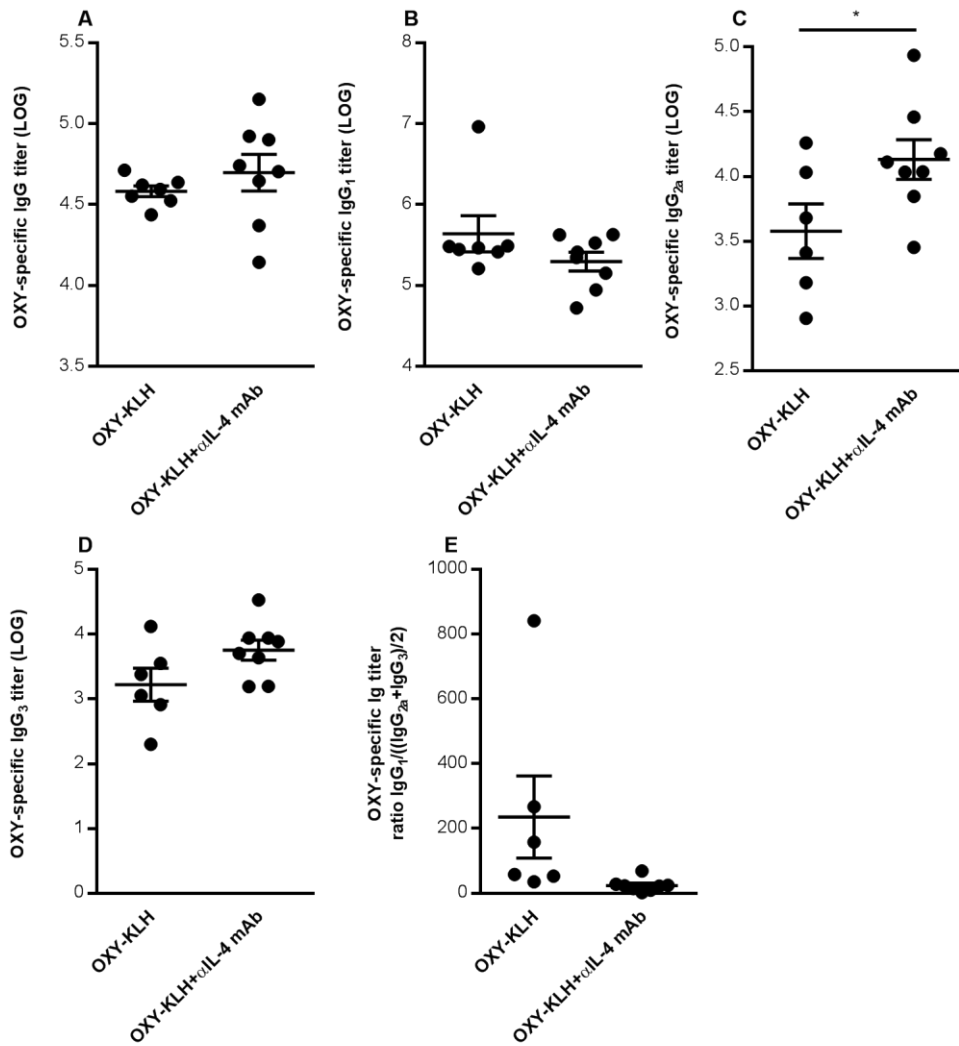

**Supplemental Figure S5. Co-administration of OXY-KLH and  $\alpha$ IL-4 mAb increases anti-oxycodone serum IgG<sub>2a</sub> antibodies in C57Bl/6 mice.** Male C57Bl/6 mice were immunized s.c. with OXY-KLH or OXY-KLH plus  $\alpha$ IL-4 mAb i.p., and anti-oxycodone serum IgG antibodies were analyzed for IgG<sub>1</sub>, IgG<sub>2a</sub>, and IgG<sub>3</sub> subclass titers: A) total oxycodone-specific IgG titers, B) IgG<sub>1</sub>, C) IgG<sub>2a</sub>, D) IgG<sub>3</sub>, and E) IgG<sub>1</sub>/((IgG<sub>2a</sub> + IgG<sub>3</sub>)/2). Data are from one experiment (n=8) and expressed as mean $\pm$ SEM. Unpaired two-tailed t-test. \*p<0.05.

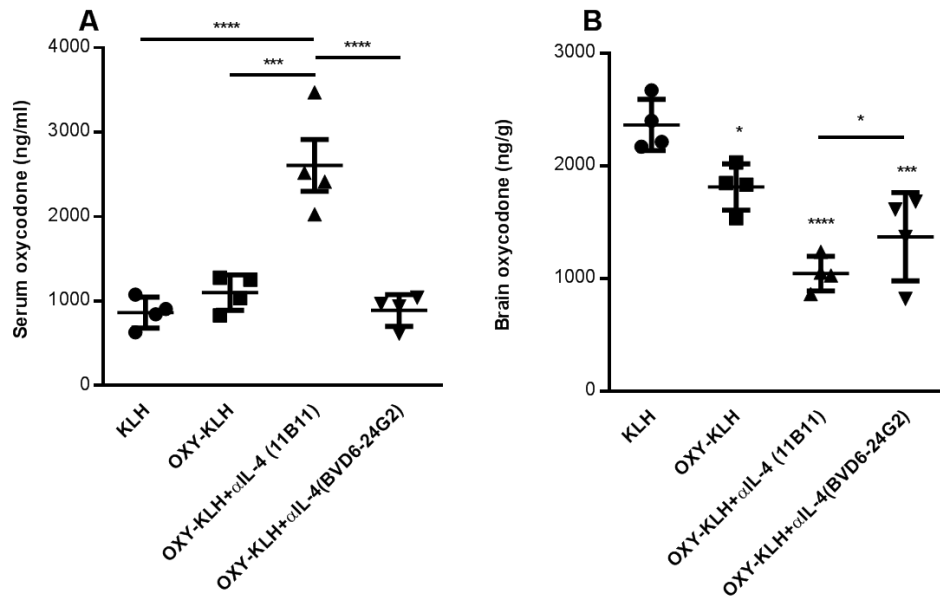

**Supplemental Figure S6. The OXY-KLH efficacy is enhanced by neutralizing  $\alpha$ IL-4 mAb but not by non-neutralizing  $\alpha$ IL-4 mAb.** Male BALB/c mice were immunized i.m. with KLH or OXY-KLH on days 0, 14 and 28, and challenged with 5.0 mg/kg oxycodone a week after the third immunization. Mice received KLH (n=4), OXY-KLH (n=4), and OXY-KLH plus either neutralizing  $\alpha$ IL-4 mAb (11B11, n=4) or non-neutralizing  $\alpha$ IL-4 mAb (BVD6-24G2, n=4). The  $\alpha$ IL-4 mAb was administered i.p. as 2 doses (0.5mg each). Data are from one experiment and expressed as mean $\pm$ SEM. One-way ANOVA paired with Tukey's multiple comparisons. \*p<0.05, \*\*\*p<0.001, and \*\*\*\*p<0.0001 compared to KLH or brackets to indicate significance between groups.



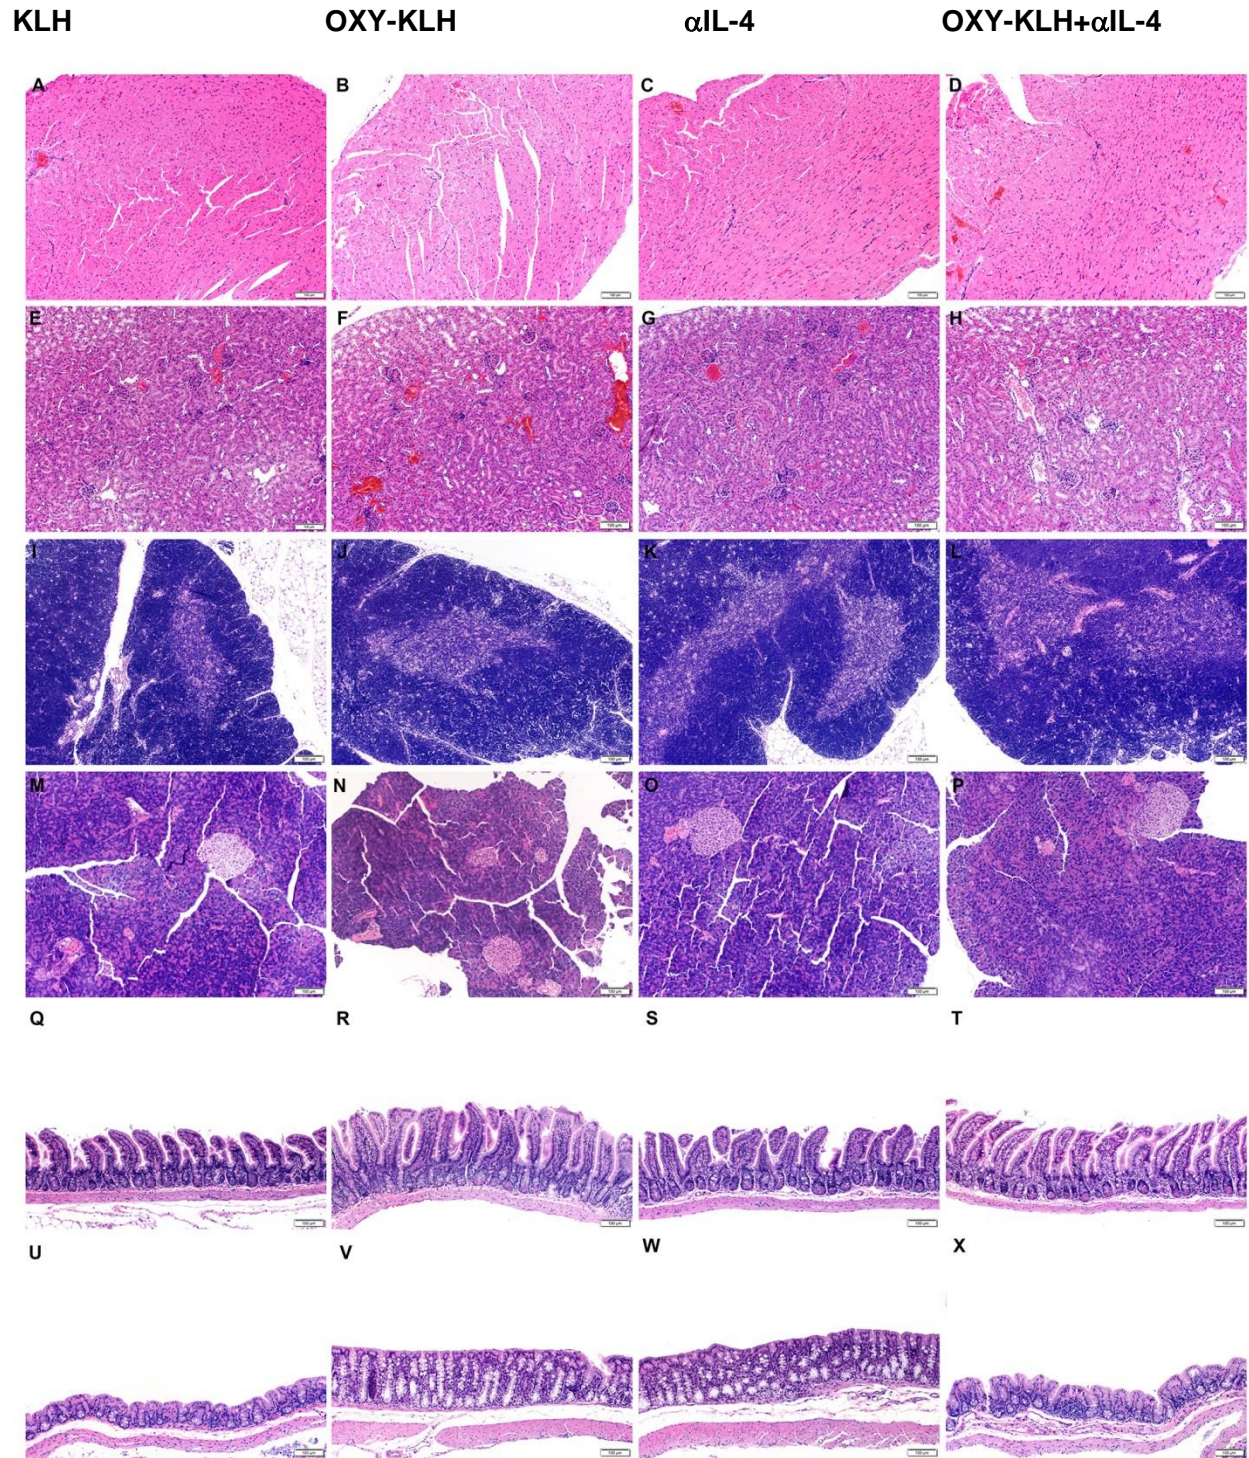

**Supplemental Figure S7. Co-administration of OXY-KLH plus  $\alpha$ IL-4 mAb is safe.** No significant pathology was identified in A-D) heart, E-H) kidney, I-L) thymus, M-P) pancreas, Q-T) small intestine, and U-X) large intestine in mice immunized with KLH (s.c.), OXY-KLH (s.c.),  $\alpha$ IL-4 (i.p.), or OXY-KLH (s.c.) plus  $\alpha$ IL-4 (i.p.).

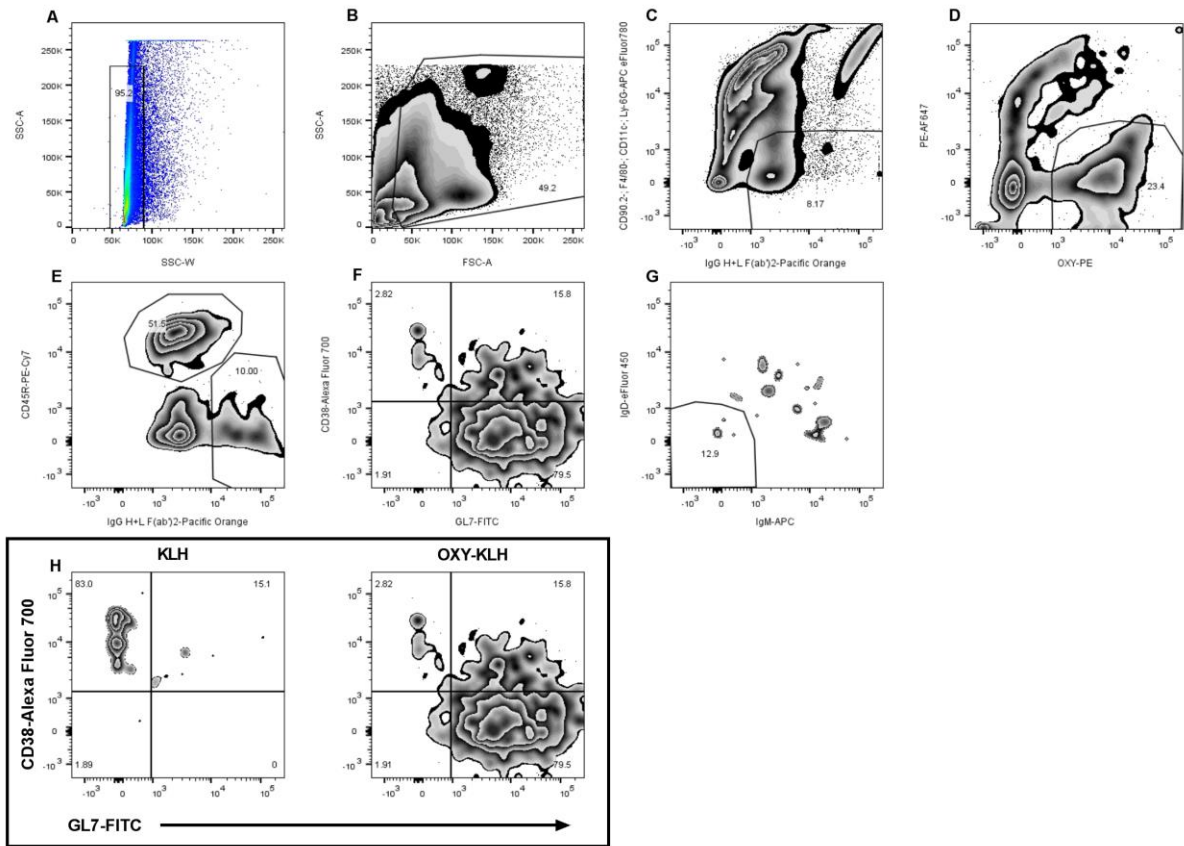

**Supplemental Figure S8.** Gating strategy for flow cytometric analysis of hapten-specific B cells and characterization of hapten-specific germinal center (GC) B cells from mouse lymphoid organs 7 d post-vaccination with OXY-KLH or unconjugated KLH control. A) Singlet gating to remove any aggregated cells. B) Total lymphocytes. C) Total B cells expressing gamma immunoglobulin G heavy and light chain (IgG+ [H+L]) and excluding the following non-B cell markers: CD90.2 (T cells), Gr-1 (neutrophils), CD11.c (dendritic cells), and F4/80 (macrophages). D) OXY-specific B cells bound to OXY-Streptavidin-PE were differentiated from B cells bound to a Streptavidin-PE<sup>AF647</sup> decoy (1,2). E) OXY-specific B cells were identified as either non antibody-secreting cells (non-ASC) expressing CD45R<sup>high</sup> or antibody-secreting cells (ASC) expressing high levels of gamma immunoglobulin (IgG<sup>high</sup>). F) OXY-specific CD45R<sup>high</sup> non-ASC B cells were identified as GL7<sup>+</sup> GC, CD38<sup>+</sup> naïve/memory (N/M), or GL7<sup>+</sup>/CD38<sup>+</sup> precursor memory B cells. G) N/M B cells were identified as IgM<sup>high</sup> or IgM<sup>low</sup>/IgD<sup>low</sup> switched immunoglobulin (swlg) cells. H) Representative comparison of CD38 and GL7 expression in mice immunized with either KLH or OXY-KLH adsorbed on alum adjuvant.



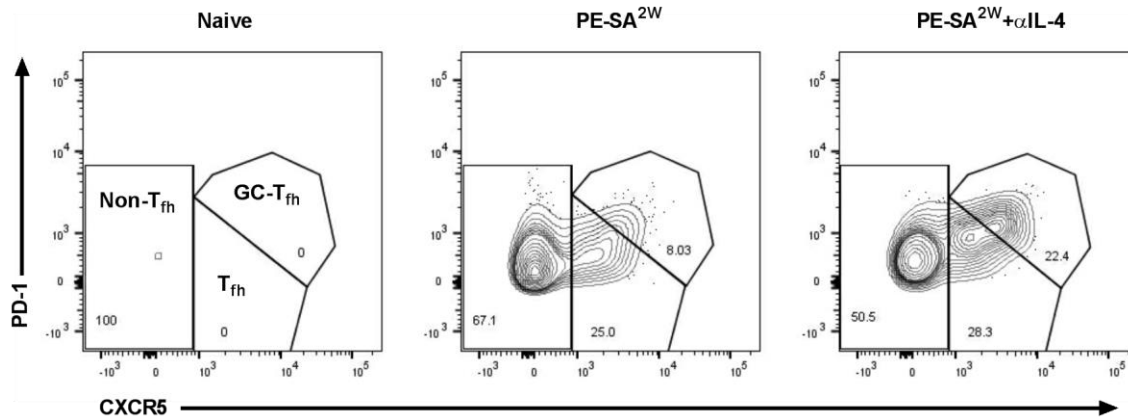

**Supplemental Figure S9.** Gating strategy for analysis of 2W1S:MHCII-restricted T cells in C57Bl/6 mice immunized with PE-SA<sup>2W</sup> with or without αIL-4 mAb, or naïve mice as control. Analysis of 2W-specific CD4<sup>+</sup> T cells was performed as described (1, 3, 4). Lymph nodes and spleens are processed to single-cell suspensions. Samples are incubated with 2W1S:I-A<sup>b</sup> tetramers conjugated to PE and APC, and BV421 anti-CXCR5 (3). Samples are then enriched with anti-PE and anti-APC magnetic beads and magnetic columns (3). After magnetic enrichment, samples are labeled with PE-Cy7 labeled CD45R, CD11b/c, CD11c, F4/80 antibodies to identify non-T cell populations, and then with T cell markers: PE anti-CD4, BV510 anti-CD8a, APC-eFluor780 anti-CD4, PerCP-eFluor710 anti-CD90.2, FITC anti-CD279 (PD-1), and AF700 anti-CD44. Flow cytometric analysis: a) singlets through standard FSC-W and FSC-A, b) T cells are CD90.2<sup>high</sup> not expressing non-T cell markers, which are then classified as CD8<sup>high</sup> T cells or CD4<sup>high</sup> T cells, c) Within the CD4<sup>high</sup> T cell subset, 2W1S-specific CD4<sup>+</sup> T cells are identified as PE<sup>high</sup> and APC<sup>high</sup>, and d) 2W1S-specific CD4<sup>+</sup> T cells are classified as CXCR5<sup>neg</sup> non-T<sub>fh</sub>, CXCR5<sup>mid</sup> PD-1<sup>neg</sup> T<sub>fh</sub>, and CXCR5<sup>high</sup> PD-1<sup>+</sup> GC-T<sub>fh</sub> (4).

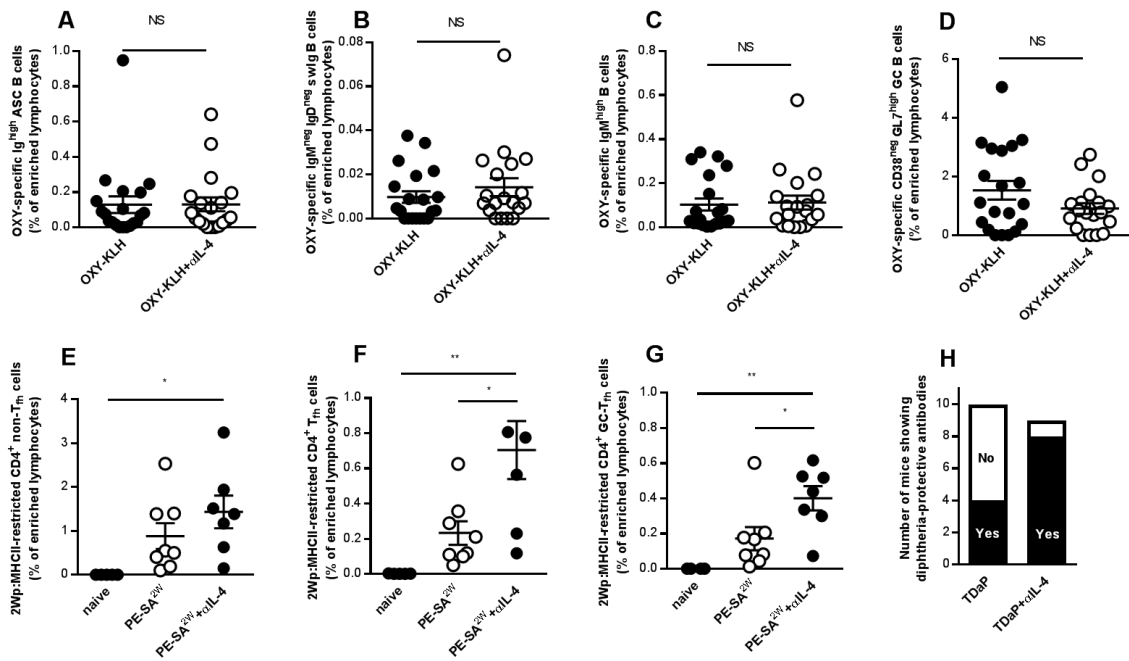

**Supplemental Figure S10.** A-G) Data from Figure 5A-F expressed as percentages of lymphocytes in enriched samples from individual mice. Analysis of the OXY-specific B cell population: A) plasma cells or antibody-secreting cells (ASC), B) switched immunoglobulin (swlg), C) IgM<sup>high</sup> naïve and memory, and D) germinal center (GC). Analysis of the 2Wp:MHCII-restricted CD4<sup>+</sup> T cell population: E) non-T<sub>fh</sub>, F) T<sub>fh</sub> and G) GC-T<sub>fh</sub>. \*p<0.05, \*\*p<0.01. H) Number of mice that showed detectable (IC<sub>50</sub>>10) protective antibody titers against diphtheria toxin. Chi-square analysis,  $\chi^2$ , df= 4.866, 1, z=2.206, p<0.05, two tailed.

**Supplemental table S1.** Effect of combining immunomodulators with vaccines on baseline nociception.

| Formulation             | Sample size | Baseline nociception (s) | Body weight (g) |
|-------------------------|-------------|--------------------------|-----------------|
| KLH                     | n=49        | 17.04±1.03               | 27.20±0.26      |
| OXY-KLH                 | n=48        | 13.93±0.57*              | 26.80±0.29      |
| OXY-KLH + $\alpha$ IL-4 | n=38        | 15.22±0.73               | 27.13±0.22      |
| OXY-KLH + $\alpha$ CD25 | n=20        | 12.38±1.03**             | 26.02±0.25*     |

Data are from mice immunized with KLH (s.c.), OXY-KLH (s.c.), OXY-KLH (s.c.) plus either  $\alpha$ IL-4 or  $\alpha$ CD25 mAb (i.p.) from experiments presented in Figures 1 and 2. Nociception is expressed as delay to hind paw lifts on a hotplate set at 54°C. Data are expressed as mean±SEM. One-way ANOVA paired with Tukey's multiple comparisons test. \*p<0.05 and \*\*p<0.01 from KLH control.

**Supplemental table S2.** Combining immunomodulators with vaccines: blood biochemistry.

| Treatment           | Protein, total (g/dL) | Bilirubin, total (mg/dL) | ALT (U/L)  | AST (U/L)  | Urea nitrogen (mg/dL) | Cholesterol (mg/dL) | Body weight (g) |
|---------------------|-----------------------|--------------------------|------------|------------|-----------------------|---------------------|-----------------|
| KLH                 | 5.7 ± 0.32            | 0.2 ± 0.10               | 71.6 ± 3.2 | 626 ± 24.7 | 20 ± 1.5              | 161 ± 10.4          | 26.5 ± 0.39     |
| OXY-KLH             | 5.4 ± 0.17            | 0.3 ± 0.11               | 74 ± 4.7   | 709 ± 51.6 | 20 ± 1.0              | 154 ± 11.0          | 27.4 ± 0.75     |
| αIL-4 mAb           | 5.8 ± 0.06            | 0.46 ± 0.03              | 104 ± 9.5  | 605 ± 253  | 27 ± 2.8              | 163 ± 0.3           | 27.7 ± 0.72     |
| OXY-KLH + αIL-4 mAb | 5.5 ± 0.26            | 0.27 ± 0.09              | 101 ± 32.3 | 840 ± 286  | 24 ± 1.0              | 158 ± 13.0          | 27.1 ± 0.24     |
| Reference Values*   | 4.2 - 5.8             | 0 - 0.5                  | 41 - 131   | 55 - 32    | 7 - 26                | 111 - 246           |                 |

Blood biochemistry analysis in BALB/c mice immunized with KLH (s.c.), OXY-KLH (s.c.), αIL-4 mAb (i.p.), and OXY-KLH (s.c.) plus αIL-4 mAb (i.p.). Reported values for protein, bilirubin, ALT (alanine aminotransferase), AST (aspartate aminotransferase), urea nitrogen and total cholesterol. Data are from one experiment and reported as mean±SEM (n=3/group). One way ANOVA paired with Tukey's multiple comparisons test. \*Reference values for BALB/c mice as reported from the Jackson Laboratory.

### Supplemental table S3. List of reagents and antibodies for flow cytometry analysis.

| <b>Reagent</b>                                                      | <b>Catalog #</b> | <b>Manufacturer</b>     |
|---------------------------------------------------------------------|------------------|-------------------------|
| <b>B cell analysis</b>                                              |                  |                         |
| OXY(Gly) <sub>4</sub> -peptide-biotin-streptavidin-PE               | --               | Custom, Pravetoni       |
| NH <sub>2</sub> -peptide-biotin-streptavidin-PE <sup>AF647</sup>    | --               | Custom, Pravetoni       |
| FITC rat-anti-mouse T and B cell Activation Antigen (clone GL7)     | 55366            | BD Pharmingen           |
| CD45R (B220) PE-Cyanine7 (Clone: RA3-6B2)<br>(formerly eBioscience) | 25-0452-82       | ThermoFisher Scientific |
| CD38 Alexa Fluor® 700 (Clone: 90)                                   | 56-0381-82       | ThermoFisher Scientific |
| IgM APC (Clone: II/41)                                              | 17-5790-82       | ThermoFisher Scientific |
| CD11c APC-eFluor® 780 (Clone: N418)                                 | 47-0114-82       | ThermoFisher Scientific |
| CD90.2 (Thy-1.2) APC-eFluor® 780 (Clone: 53-2.1)                    | 47-0902-82       | ThermoFisher Scientific |
| F4/80 Antigen APC-eFluor® 780 (Clone: BM8)                          | 47-4801-82       | ThermoFisher Scientific |
| Ly-6G (Gr-1) APC-eFluor® 780 (Clone: RB6-8C5)                       | 47-5931-82       | ThermoFisher Scientific |
| IgD eFluor® 450 (Clone: 11-26c)                                     | 48-5993-82       | ThermoFisher Scientific |
| IgG H+L F(ab') <sub>2</sub> Pacific Orange<br>Technologies)         | P31585           | Invitrogen (Life        |
| <b>B cell compensation staining</b>                                 |                  |                         |
| CD4 FITC (Clone: GK1.5)                                             | 11-0041-85       | ThermoFisher Scientific |
| CD4 PE (Clone: GK1.5)                                               | 12-0041-83       | ThermoFisher Scientific |
| CD4 PE-Cyanine5 (Clone: GK1.5)                                      | 15-0041-83       | ThermoFisher Scientific |
| <b>T cell analysis</b>                                              |                  |                         |
| 2Wp:MCHII-PE and -APC                                               | --               | Custom, Marc Jenkins    |
| CD44 AlexaFluor700 clone IM7                                        | 56-0441-82       | ThermoFisher Scientific |
| CD45R (B220) PE-Cy7 clone RA3-6B2                                   | 25-0452-82       | ThermoFisher Scientific |
| CD11b PE-Cy7 clone M1/70                                            | 552850           | BD biosciences          |
| CD11c PE-Cy7 clone N418                                             | 25-0114-82       | ThermoFisher Scientific |
| CD279 (PD-1) FITC clone J43                                         | 11-9985-82       | ThermoFisher Scientific |
| CD4 APC clone GK1.5                                                 | 17-0041-82       | ThermoFisher Scientific |
| CD4 APC-eFluor780 clone RM4-5                                       | 47-0042-82       | ThermoFisher Scientific |
| CD8a BV510 clone 53-6.7                                             | 563068           | BD biosciences          |
| CD90.2 (Thy-1.2) PerCP-eFluor710 clone 30-H12                       | 46-0903-82       | ThermoFisher Scientific |
| CXCR5 BV421 clone 2G8                                               | 562889           | BD biosciences          |
| F4/80 PE-Cy7 clone BM8                                              | 25-4801-82       | ThermoFisher Scientific |

### Supplemental figure references

1. Laudenbach M, Baruffaldi F, Vervacke JS et al. The frequency of naive and early-activated hapten-specific B cell subsets dictates the efficacy of a therapeutic vaccine against prescription opioid abuse. *J Immunol* 2015;194:5926-36.
2. Taylor JJ, Laudenbach M, Tucker AM, Jenkins MK, Pravetoni M. Hapten-specific naive B cells are biomarkers of vaccine efficacy against drugs of abuse. *J Immunol Methods* 2014;405:74-86.
3. Tubo NJ, Pagan AJ, Taylor JJ et al. Single Naive CD4(+) T Cells from a Diverse Repertoire Produce Different Effector Cell Types during Infection. *Cell* 2013;153:785-96.
4. Yang JA, Tubo NJ, Gearhart MD, Bardwell VJ, Jenkins MK. Cutting edge: Bcl6-interacting corepressor contributes to germinal center T follicular helper cell formation and B cell helper function. *J Immunol*. 2015 Jun 15;194(12):5604-8.
